# Supplementary material
Source: publisher figshare collection journal article supplement (https://frontiersin.figshare.com/ndownloader/files/13684682)
Supplement: Supplementary file [file 13684682]

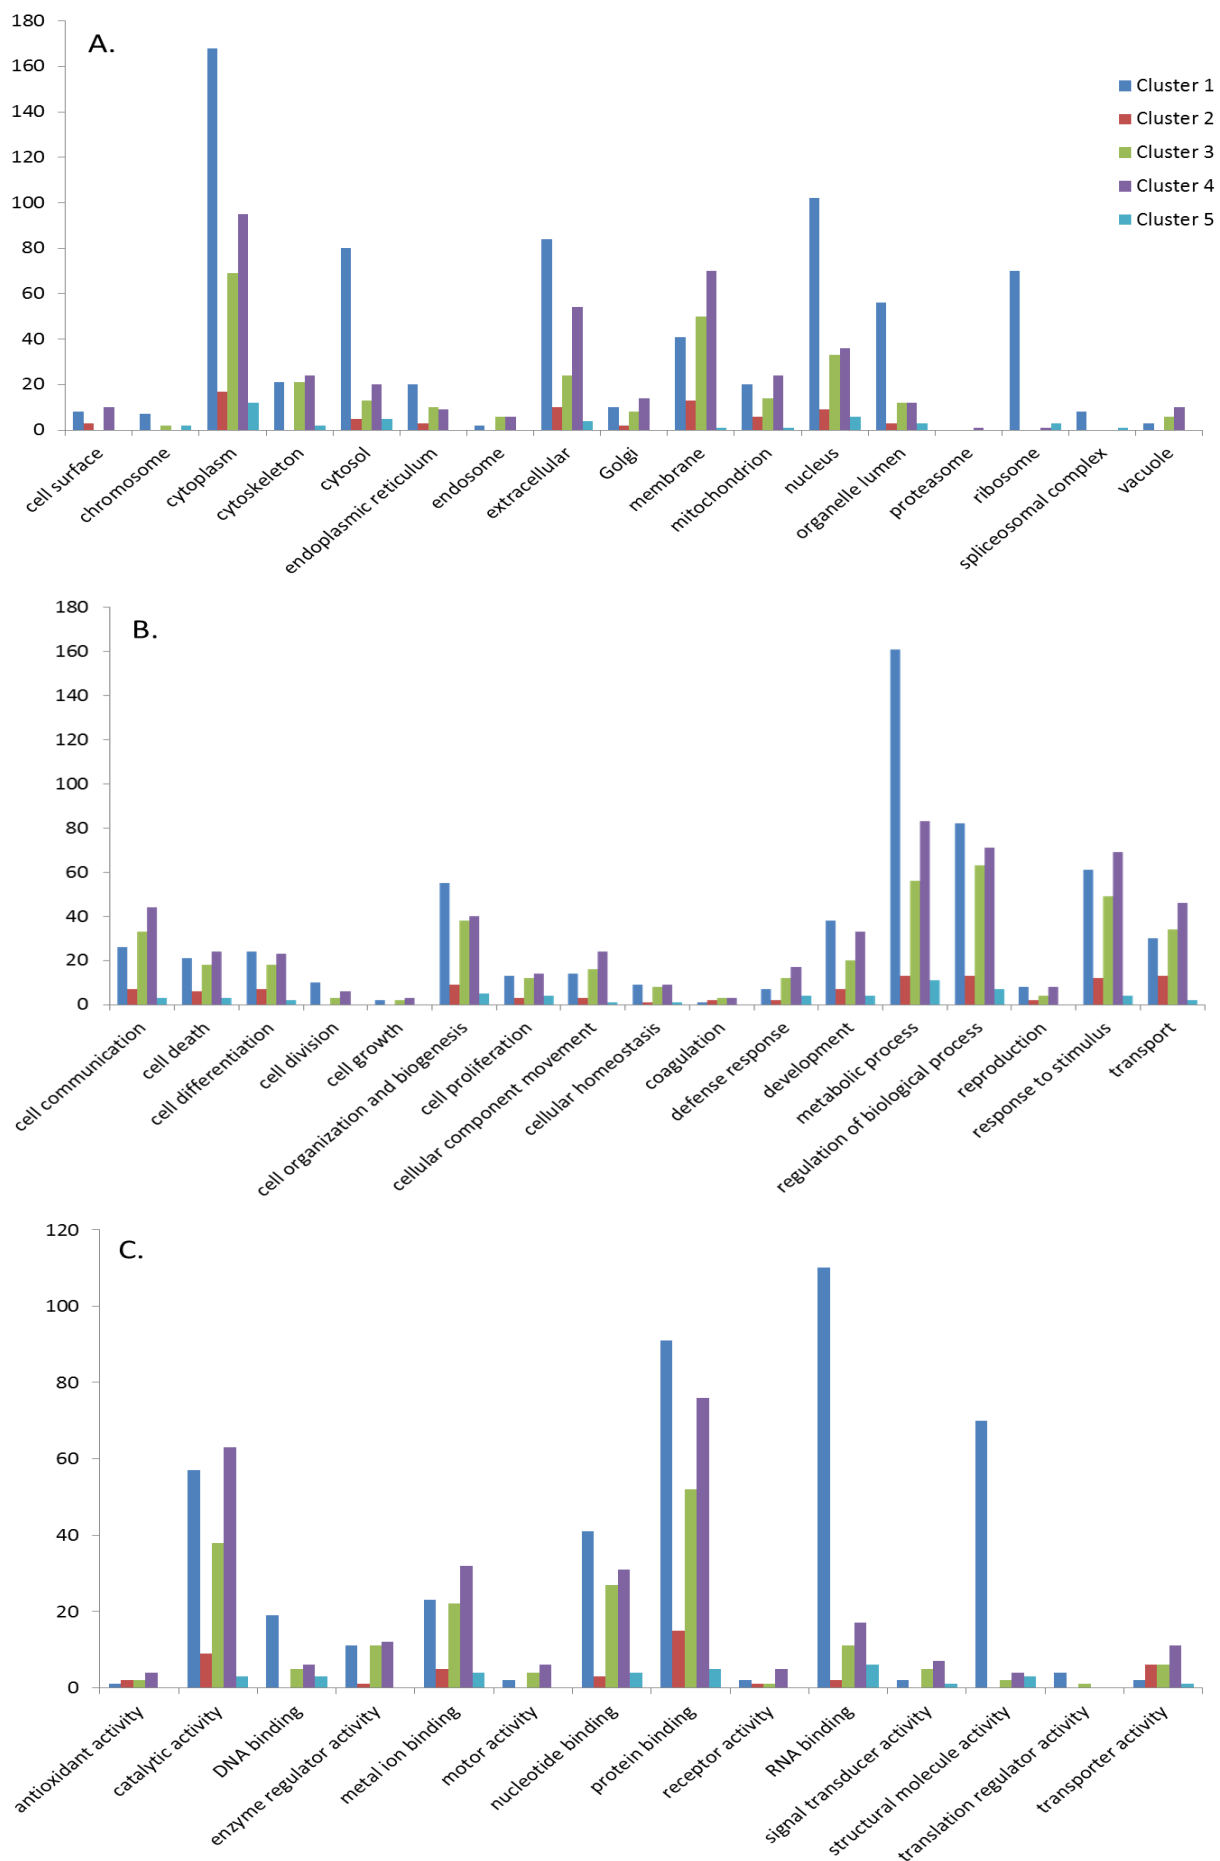

Supplementary figure S1: GO slim analysis for the identified proteins grouped by abundance cluster. A: Cellular component terms; B: Biological process terms; C: Molecular function terms.
